# Supplementary material for: A new near infrared photosensitizing nanoplatform containing blue-emitting up-conversion nanoparticles and hypocrellin A for photodynamic therapy of cancer cells
Source: Royal Society of Chemistry journal article supplement (doi:10.1039/c3nr03515h), 2013-01-01
Supplement: c3nr03515h.pdf [file c3nr03515h.pdf]

# Supporting Information

A new near infrared photosensitizing nanoplatform containing  
blue-emitting up-conversion nanoparticles and hypocrellin A for  
photodynamic therapy of cancer cell

Shan Jin<sup>ac,§</sup>, Liangjun Zhou<sup>ac,§</sup>, Zhanjun Gu<sup>a,\*</sup>, Gan Tian<sup>ad</sup>, Liang Yan<sup>a</sup>, Wenlu Ren<sup>a</sup>, Wenyan Yin<sup>a</sup>,  
Xiaodong Liu<sup>ae</sup>, Xiao Zhang<sup>ab</sup>, Zhongbo Hu<sup>c</sup>, Yuliang Zhao<sup>ab,\*</sup>

<sup>a</sup>Key Laboratory for Biomedical Effects of Nanomaterials and Nanosafety, Institute of High Energy Physics, Chinese Academy of Sciences, Beijing 100049, P. R.China

<sup>b</sup> Key Laboratory for Biomedical Effects of Nanomaterials and Nanosafety, National Center for Nanosciences and Technology of China, Beijing, 100190, China.

<sup>c</sup>College of Materials Science and Opto-Electronic Technology, Graduate University of Chinese Academy of Sciences, Beijing 100049, P. R.China

<sup>d</sup>College of Chemistry, Sichuan University, Chengdu, 610064, P. R. China

<sup>e</sup>College of Environmental and Chemical Engineering, Yanshan University, Qinhuangdao, 066004, P. R. China.

\* Corresponding Authors: zjgu@ihep.ac.cn, zhaoyuliang@ihep.ac.cn.

§ These authors contributed equally.

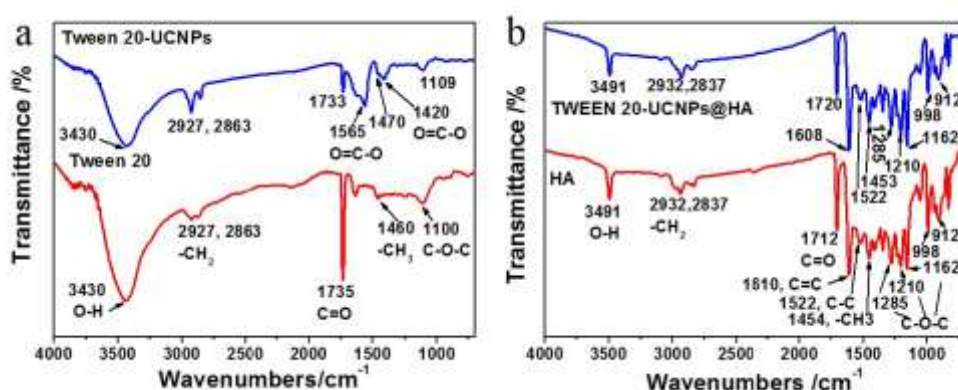

**Fig. S1** FT-IR spectra of (a) Tween 20-UCNPs and Tween 20; (b) Tween 20-UCNPs@HA and HA. In these four samples, it is clear to find that the strong and broad band around 3430/3491 cm<sup>-1</sup>, corresponding to the O-H stretching vibrations, and the bands centered at 2927/2932 cm<sup>-1</sup> and 2863/2837 cm<sup>-1</sup>, associated with the asymmetric ( $\nu_{as}$ ) and symmetric ( $\nu_s$ ) stretching vibrations of methylene (-CH<sub>2</sub>), respectively. Stretching vibrations generated by O-C=O carboxylic group at 1565 cm<sup>-1</sup> and 1420 cm<sup>-1</sup> demonstrated the bound oleic acid while disappeared in Tween 20-UCNPs@HA due to strong signal of HA. Moreover, characteristic bands of C=O ester group and C-O-C group belong to Tween 20 are observed in (a) at 1735 cm<sup>-1</sup> and 1100 cm<sup>-1</sup>, respectively, which are also found in Tween 20-UCNPs but greatly reduced (1733 cm<sup>-1</sup> and 1109 cm<sup>-1</sup>). The C=O bands (1712 cm<sup>-1</sup> and 1710 cm<sup>-1</sup>) also could be observed in (b) with three bands (1285 cm<sup>-1</sup>, 1210 cm<sup>-1</sup> and 1162 cm<sup>-1</sup>) belong to stretching vibrations of C-O-C groups. Band at 1460/1470/1454/1453 cm<sup>-1</sup> in all spectra attributed to  $\nu_{as}$  of -CH<sub>3</sub> groups. The three bands (998 cm<sup>-1</sup>, 912 cm<sup>-1</sup> and 814 cm<sup>-1</sup>) observed in (b) are assigned to the deformation vibration of ring hydrogens.<sup>1-6</sup>

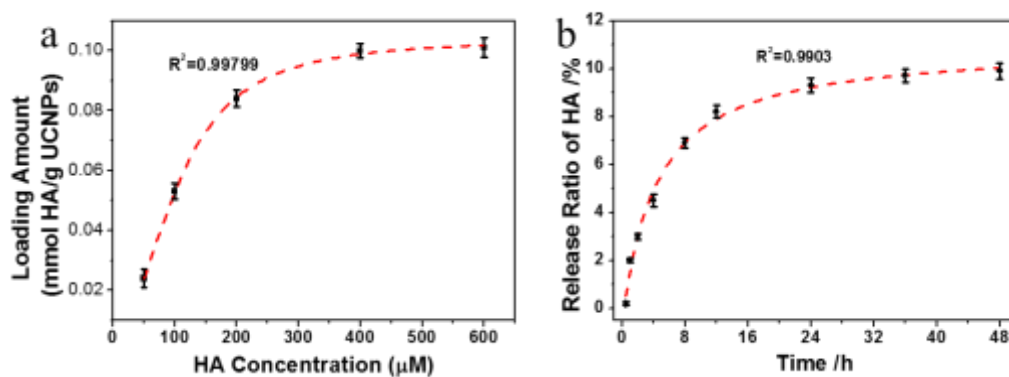

**Fig. S2** (a) HA Loading amount of UCNPs *versus* increased concentrations of HA. (b) Cumulative HA released from Tween 20-UCNPs@HA in PBS (pH=7.4) under continuous stirring for different time at 37 °C. All these studies were repeated for three times.

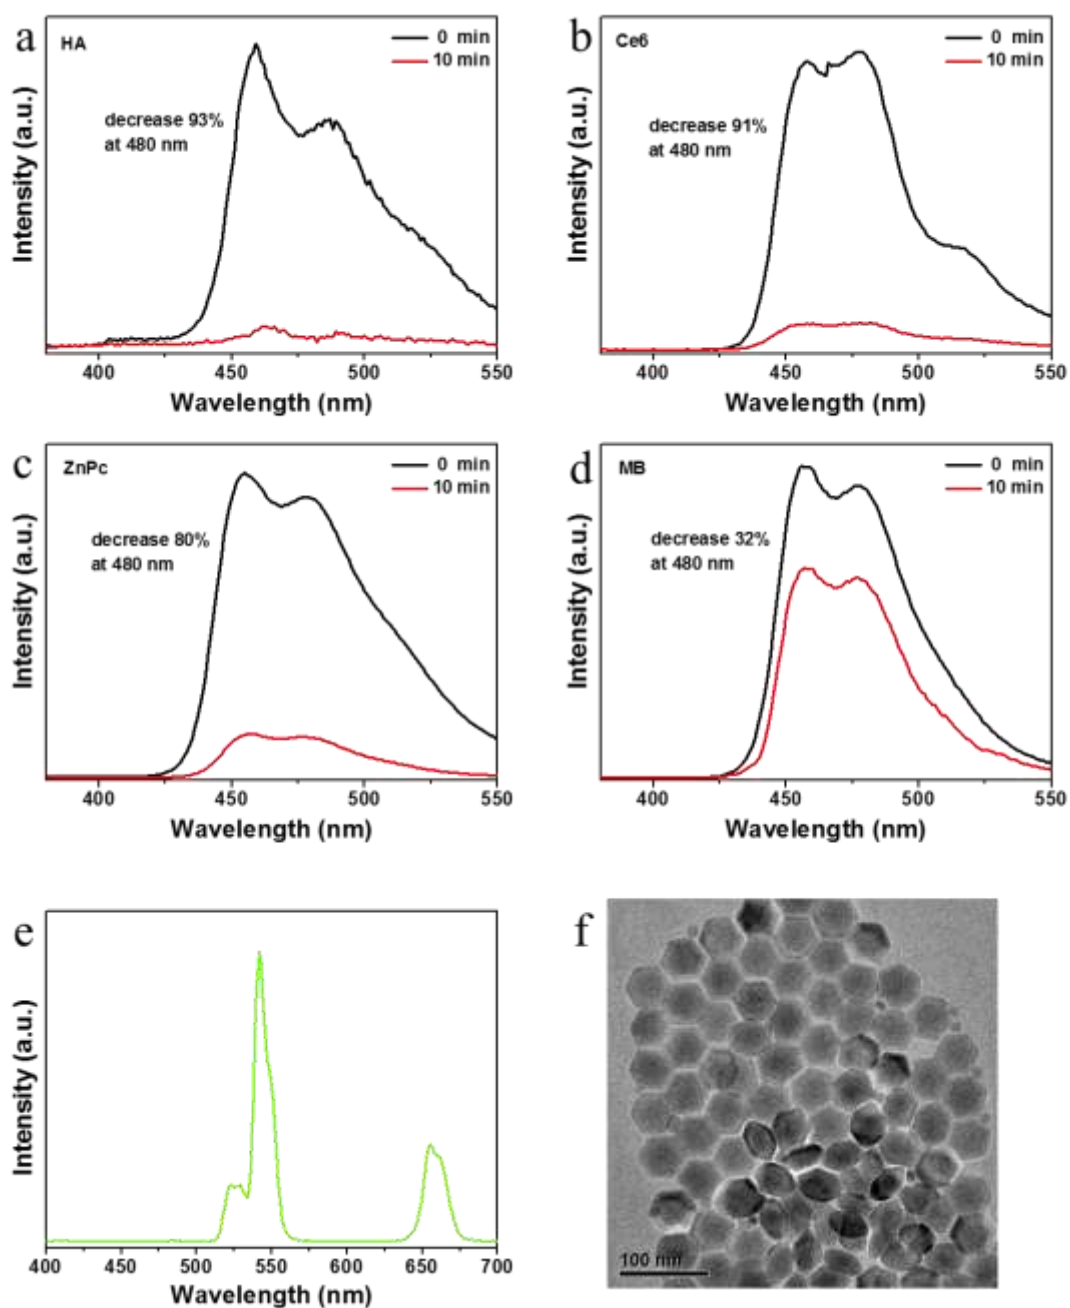

**Fig. S3** Luminescent intensity changes of DPBF in acetonitrile (15  $\mu\text{L}$ , 5 mM) dealt with 4 mL dispersion of Tween 20-UCNPs@PSs (2.5 mg/mL; a: HA; b: Ce6; c: ZnPc; d: MB) after 980 nm laser irradiation (0.8  $\text{W}/\text{cm}^2$ ) for 10 min. (e) Up-conversion luminescence spectrum and (f) TEM image of NaYbF<sub>4</sub>:Er UCNP used in b-d.

## References:

1. H. Xing, W. Bu, Q. Ren, X. Zheng, M. Li, S. Zhang, H. Qu, Z. Wang, Y. Hua, K. Zhao, L. Zhou, W. Peng and J. Shi, *Biomaterials*, 2012, **33**, 5384-5393.
2. W. L. Ren, G. Tian, S. Jian, Z. J. Gu, L. J. Zhou, L. Yan, S. Jin, W. Y. Yin and Y. L. Zhao,

- Rsc Adv.*, 2012, **2**, 7037-7041.
3. Z. Chen, H. Chen, H. Hu, M. Yu, F. Li, Q. Zhang, Z. Zhou, T. Yi and C. Huang, *J. Am. Chem. Soc.*, 2008, **130**, 3023-3029.
  4. Y. Zhang, L. Song, J. Xie, H. Qiu, Y. Gu and J. Zhao, *Photochem. Photobiol.*, 2010, **86**, 667-672.
  5. L. Zhou, H. J. Jiang, S. H. Wei, X. F. Ge, J. H. Zhou and J. Shen, *Carbon*, 2012, **50**, 5594-5604.
  6. L. Zhou, W. Wang, J. Tang, J.-H. Zhou, H.-J. Jiang and J. Shen, *Chem. Eur. J.*, 2011, **17**, 12084-12091.
